# Supplementary material
Source: Springer Nature journal article supplement (https://www.springermedizin.de/resource/supplementary/12901_2009_60_MOESM4_ESM.pdf/9515438)

**Disease Free Survival by stage**

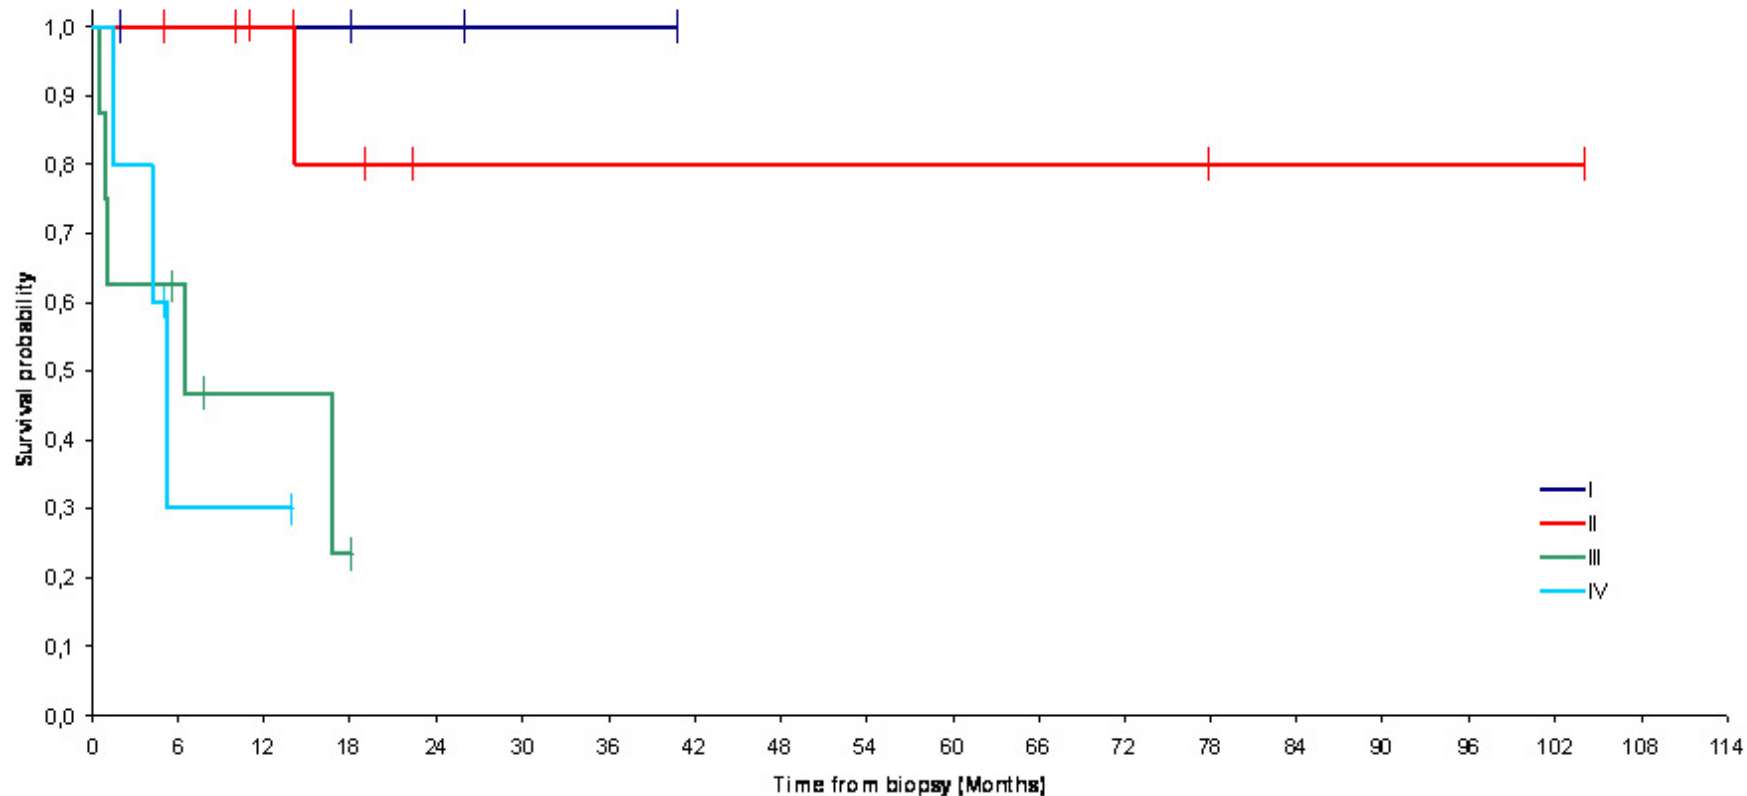

Supplement: MOESM4 [file 9515438]
